# Supplementary material
Source: PubMed Central journal article supplement (PMC2828142)
Supplement: tjp0588-0713-SD1.pdf [file tjp0588-0713-SD1.pdf]

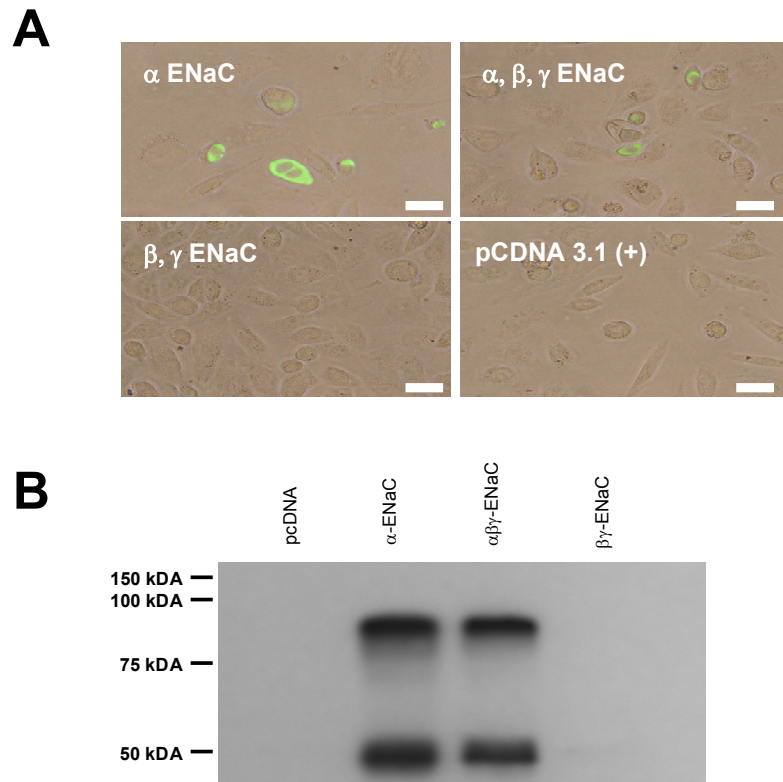

**Supplemental Figure 1. Anti  $\alpha$ -ENaC specificity.** Expression plasmids were generated by inserting mouse cDNA encoding  $\alpha$ ,  $\beta$  and  $\gamma$ -ENaC into pCDNA 3.1 (+) plasmid (Invitrogen). (A)  $\alpha$ -ENaC immunofluorescence performed on CHO cells 48 hrs after transfection using lipofectamine 2000 (Invitrogen). The secondary antibody used was Alexa Fluor® 488 goat anti-rabbit IgG (Invitrogen). Immunofluorescent labelling was present only when the  $\alpha$ -ENaC-containing plasmid was present during the transfection. (B)  $\alpha$ -ENaC antibody specificity was assessed by western blot using whole lysates from CHO cells 48 hrs after transfection. Immunoreactivity was present only when the  $\alpha$ -ENaC-containing plasmid was present during the transfection. 5  $\mu$ g per plasmid were used for either immunofluorescence and western blot CHO cells transfections. Bars, 50  $\mu$ m.
