# Supplementary material
Source: PubMed Central journal article supplement (PMC2828142)
Supplement: tjp0588-0713-SD2.pdf [file tjp0588-0713-SD2.pdf]

**Supplemental Table 1. Submandibular NaCl reabsorption is enhanced by  $\beta$ -adrenergic stimulation.**

| (mM)      | <u>0.3 <math>\mu</math>M CCh + 5 <math>\mu</math>M IPR</u> | <u>0.3 <math>\mu</math>M CCh</u> |
|-----------|------------------------------------------------------------|----------------------------------|
| <b>Na</b> | 31.5 $\pm$ 3.6 *<br>(13)                                   | 75.2 $\pm$ 4.4<br>(14)           |
| <b>K</b>  | 51.2 $\pm$ 6.7<br>(13)                                     | 39.9 $\pm$ 3.1<br>(14)           |
| <b>Cl</b> | 40.41 $\pm$ 6.0 *<br>(13)                                  | 98.4 $\pm$ 4.0<br>(14)           |

Ion composition analysis of *ex vivo* submandibular saliva from wildtype mice stimulated with 0.3  $\mu$ M CCh or with 0.3  $\mu$ M CCh + 5  $\mu$ M IPR. Data are given as the mean  $\pm$  the S.E.M. Note that the Na<sup>+</sup> and Cl<sup>-</sup> concentrations were significantly reduced by  $\beta$ -adrenergic stimulation (\*),  $p < 0.05$ , *t* test. n are given between parenthesis.
